# Supplementary material
Source: publisher site journal article supplement (https://www.dovepress.com/article/390858)

**Supplementary table and figure legends**

**Table 1S.** Systemic inflammation-based prognostic scores.

**Figure 1S.** Flowchart of patient selection

**Table 1S.** Systemic inflammation-based prognostic scores.

| Scoring systems                                                                                                                               | Score |
|-----------------------------------------------------------------------------------------------------------------------------------------------|-------|
| Lactate Dehydrogenase (LDH)                                                                                                                   |       |
| <219.2(U/L)                                                                                                                                   |       |
| ≥219.2(U/L)                                                                                                                                   |       |
| Glasgow Prognostic Score (GPS)                                                                                                                |       |
| CRP (≤10 mg/L) and albumin (≥35 g/L)                                                                                                          | 0     |
| CRP (≤10 mg/L) and albumin (<35 g/L)                                                                                                          | 1     |
| CRP (>10 mg/L) and albumin (≥35 g/L)                                                                                                          | 1     |
| CRP (>10 mg/L) and albumin (<35 g/L)                                                                                                          | 2     |
| Modified Glasgow Prognostic Score (mGPS)                                                                                                      |       |
| CRP (≤10 mg/L) and albumin (≥35 g/L)                                                                                                          | 0     |
| CRP (≤10 mg/L) and albumin (<35 g/L)                                                                                                          | 0     |
| CRP (>10 mg/L) and albumin (≥35 g/L)                                                                                                          | 1     |
| CRP (>10 mg/L) and albumin (<35 g/L)                                                                                                          | 2     |
| Prognostic Index (PI)                                                                                                                         |       |
| CRP (≤10 mg/L) and WBC (≤10 × 10 <sup>9</sup> /L)                                                                                             | 0     |
| CRP (≤10 mg/L) and WBC (>10 × 10 <sup>9</sup> /L)                                                                                             | 1     |
| CRP (>10 mg/L) and WBC (≤10 × 10 <sup>9</sup> /L)                                                                                             | 1     |
| CRP (>10 mg/L) and WBC (>10 × 10 <sup>9</sup> /L)                                                                                             | 2     |
| Prognostic Nutritional Index (PNI)                                                                                                            |       |
| Albumin (g/L) + 5 × total lymphocyte count (×10 <sup>9</sup> /L) ≥45                                                                          | 0     |
| Albumin (g/L) + 5 × total lymphocyte count (×10 <sup>9</sup> /L) <45                                                                          | 1     |
| Neutrophil to lymphocyte ratio (NLR)                                                                                                          |       |
| Neutrophil count (×10 <sup>9</sup> /L): lymphocyte count (×10 <sup>9</sup> /L) <5                                                             | 0     |
| Neutrophil count (×10 <sup>9</sup> /L): lymphocyte count (×10 <sup>9</sup> /L) ≥5                                                             | 1     |
| Platelet to lymphocyte ratio (PLR)                                                                                                            |       |
| Platelet count (×10 <sup>9</sup> /L): lymphocyte count (×10 <sup>9</sup> /L) <150                                                             | 0     |
| Platelet count (×10 <sup>9</sup> /L): lymphocyte count (×10 <sup>9</sup> /L) ≥150                                                             | 1     |
| Systemic immune-inflammation index (SII)                                                                                                      |       |
| Platelet count (×10 <sup>9</sup> /L) × neutrophil count (×10 <sup>9</sup> /L)/lymphocyte count (×10 <sup>9</sup> /L) < OS<br>352.2; RFS 293.6 | 0     |
| Platelet count (×10 <sup>9</sup> /L) × neutrophil count (×10 <sup>9</sup> /L)/lymphocyte count (×10 <sup>9</sup> /L) ≥ OS<br>352.2; RFS 293.6 | 1     |

CRP, C-reactive protein; WBC, white blood cell.

**Figure 1S.** Flowchart of patient selection

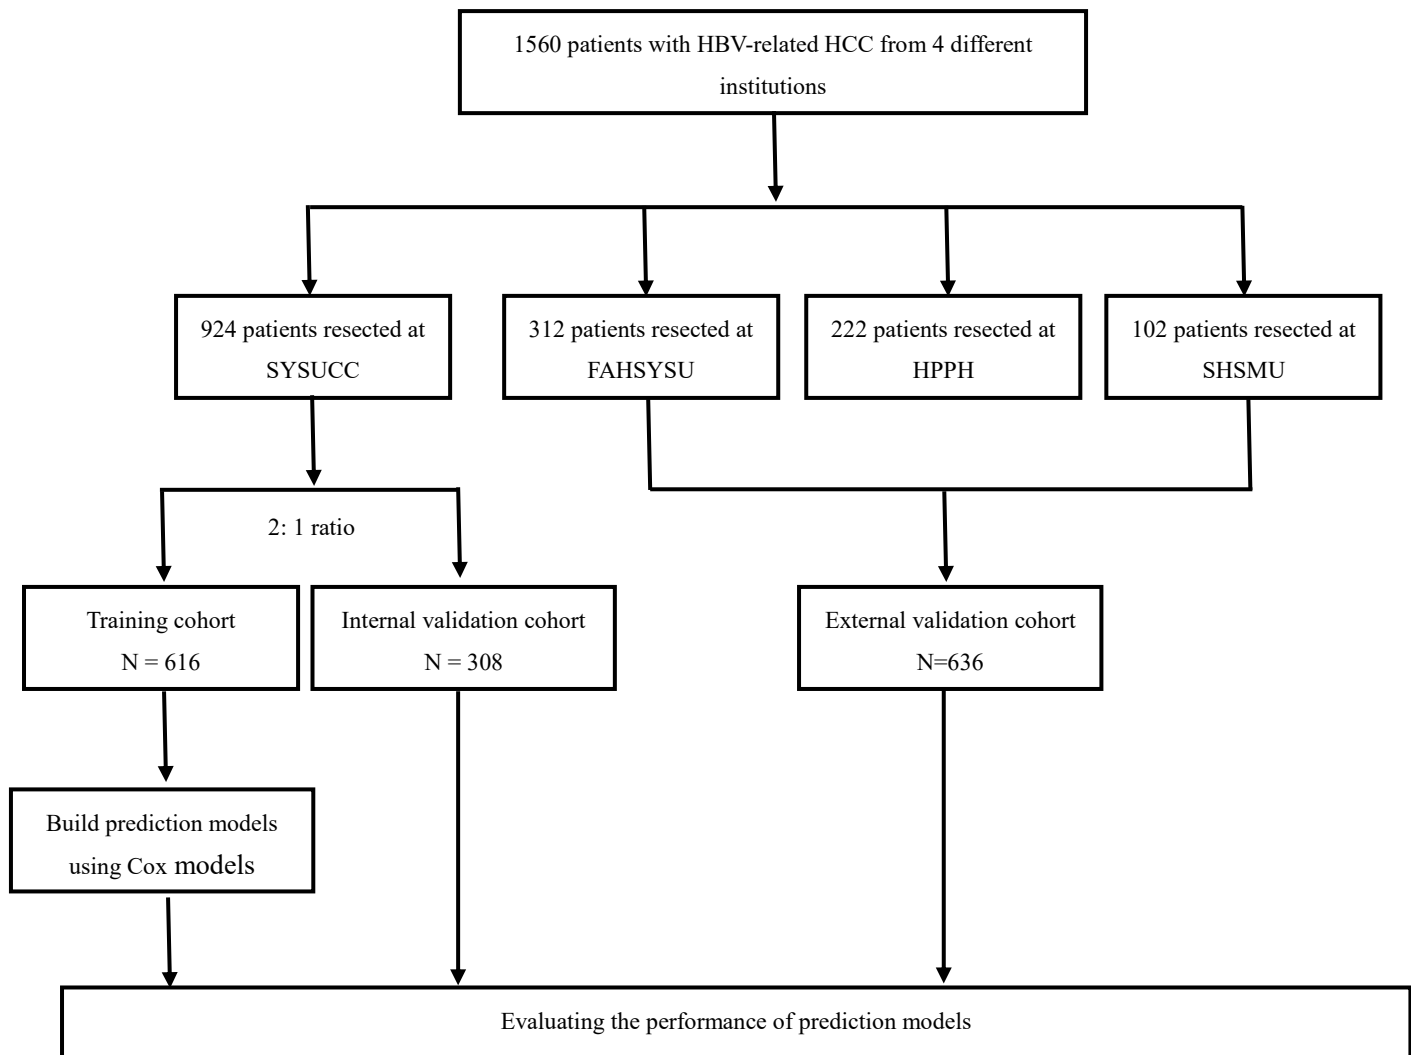

Supplement: Supplementary file 1 [file get_supplementary_file.php]
